# Supplementary material for: TGFβ signaling in Tribolium: vertebrate-like components in a beetle
Source: Springer Nature journal article supplement (doi:10.1007/s00427-007-0179-7), 2008-04-01
Supplement: MOESM1 [file 427_2007_179_MOESM1_ESM.doc]

Supplementary citations:

*Drosophila* Dpp plays a role in a plethora of developmental processes, such as dorsoventral patterning of the embryo (Mizutani et al., 2005; O'Connor et al., 2006; Shimmi et al., 2005; Wang and Ferguson, 2005), wing venation (O'Connor et al., 2006; Ralston and Blair, 2005; Sotillos and De Celis, 2005; Sotillos and de Celis, 2006), imaginal disc patterning (Hsiung et al., 2005; Kim et al., 2006; Shen and Dahmann, 2005b), growth of the wing and haltere (Crickmore and Mann, 2006; de Navas et al., 2006; Makhijani et al., 2006; Mohit et al., 2006; Rogulja and Irvine, 2005), morphogenesis of the leg (Joshi et al., 2006; Manjon et al., 2007), development of the eye (Bessa and Casares, 2005; Vrailas and Moses, 2006), egg shell patterning (see Berg, 2005 for review), cytoskeletal remodelling in wing disc cells and follicle cells (Gibson and Perrimon, 2005; Shen and Dahmann, 2005a; Wahlstrom et al., 2006), the development of neurosecretory cells in the brain (de Velasco et al., 2006), the maintenance of germ-line stem cells (reviewed in Lin, 2002), development of the ventral head and proboscis (Stultz et al., 2006; Yasunaga et al., 2006), and even neoplastic tumor formation (Perez-Garijo et al., 2005), (see Parker et al., 2004 for review of the older literature).

**Berg, C. A.** (2005). The Drosophila shell game: patterning genes and morphological change. *Trends Genet* **21**, 346-55.

**Bessa, J. and Casares, F.** (2005). Restricted teashirt expression confers eye-specific responsiveness to Dpp and Wg signals during eye specification in Drosophila. *Development* **132**, 5011-20.

**Crickmore, M. A. and Mann, R. S.** (2006). Hox control of organ size by regulation of morphogen production and mobility. *Science* **313**, 63-8.

**de Navas, L. F., Garaulet, D. L. and Sanchez-Herrero, E.** (2006). The Ultrabithorax Hox gene of Drosophila controls haltere size by regulating the Dpp pathway. *Development* **133**, 4495-506.

**de Velasco, B., Erclik, T., Shy, D., Sclafani, J., Lipshitz, H., McInnes, R. and Hartenstein, V.** (2006). Specification and development of the pars intercerebralis and pars lateralis, neuroendocrine command centers in the Drosophila brain. *Dev Biol*.

**Gibson, M. C. and Perrimon, N.** (2005). Extrusion and death of DPP/BMP-compromised epithelial cells in the developing Drosophila wing. *Science* **307**, 1785-9.

**Hsiung, F., Ramirez-Weber, F. A., Iwaki, D. D. and Kornberg, T. B.** (2005). Dependence of Drosophila wing imaginal disc cytonemes on Decapentaplegic. *Nature* **437**, 560-3.

**Joshi, M., Buchanan, K. T., Shroff, S. and Orenic, T. V.** (2006). Delta and Hairy establish a periodic prepattern that positions sensory bristles in Drosophila legs. *Dev Biol* **293**, 64-76.

**Kim, S., Chung, S., Yoon, J., Choi, K. W. and Yim, J.** (2006). Ectopic expression of Tollo/Toll-8 antagonizes Dpp signaling and induces cell sorting in the Drosophila wing. *Genesis* **44**, 541-9.

**Lin, H.** (2002). The stem-cell niche theory: lessons from flies. *Nat Rev Genet* **3**, 931-40.

**Makhijani, K., Kalyani, C., Srividya, T. and Shashidhara, L. S.** (2006). Modulation of Decapentaplegic gradient during haltere specification in Drosophila. *Dev Biol*.

**Manjon, C., Sanchez-Herrero, E. and Suzanne, M.** (2007). Sharp boundaries of Dpp signalling trigger local cell death required for Drosophila leg morphogenesis. *Nat Cell Biol* **9**, 57-63.

**Mizutani, C. M., Nie, Q., Wan, F. Y., Zhang, Y. T., Vilmos, P., Sousa-Neves, R., Bier, E., Marsh, J. L. and Lander, A. D.** (2005). Formation of the BMP activity gradient in the Drosophila embryo. *Dev Cell* **8**, 915-24.

**Mohit, P., Makhijani, K., Madhavi, M. B., Bharathi, V., Lal, A., Sirdesai, G., Reddy, V. R., Ramesh, P., Kannan, R., Dhawan, J. et al.** (2006). Modulation of AP and DV signaling pathways by the homeotic gene Ultrabithorax during haltere development in Drosophila. *Dev Biol* **291**, 356-67.

**O'Connor, M. B., Umulis, D., Othmer, H. G. and Blair, S. S.** (2006). Shaping BMP morphogen gradients in the Drosophila embryo and pupal wing. *Development* **133**, 183-93.

**Perez-Garijo, A., Martin, F. A., Struhl, G. and Morata, G.** (2005). Dpp signaling and the induction of neoplastic tumors by caspase-inhibited apoptotic cells in Drosophila. *Proc Natl Acad Sci U S A* **102**, 17664-9.

**Ralston, A. and Blair, S. S.** (2005). Long-range Dpp signaling is regulated to restrict BMP signaling to a crossvein competent zone. *Dev Biol* **280**, 187-200.

**Rogulja, D. and Irvine, K. D.** (2005). Regulation of cell proliferation by a morphogen gradient. *Cell* **123**, 449-61.

**Shen, J. and Dahmann, C.** (2005a). Extrusion of cells with inappropriate Dpp signaling from Drosophila wing disc epithelia. *Science* **307**, 1789-90.

**Shen, J. and Dahmann, C.** (2005b). The role of Dpp signaling in maintaining the Drosophila anteroposterior compartment boundary. *Dev Biol* **279**, 31-43.

**Shimmi, O., Umulis, D., Othmer, H. and O'Connor, M. B.** (2005). Facilitated transport of a Dpp/Scw heterodimer by Sog/Tsg leads to robust patterning of the Drosophila blastoderm embryo. *Cell* **120**, 873-86.

**Sotillos, S. and De Celis, J. F.** (2005). Interactions between the Notch, EGFR, and decapentaplegic signaling pathways regulate vein differentiation during Drosophila pupal wing development. *Dev Dyn* **232**, 738-52.

**Sotillos, S. and de Celis, J. F.** (2006). Regulation of decapentaplegic expression during Drosophila wing veins pupal development. *Mech Dev* **123**, 241-51.

**Stultz, B. G., Lee, H., Ramon, K. and Hursh, D. A.** (2006). Decapentaplegic head capsule mutations disrupt novel peripodial expression controlling the morphogenesis of the Drosophila ventral head. *Dev Biol* **296**, 329-39.

**Vrailas, A. D. and Moses, K.** (2006). Smoothened, thickveins and the genetic control of cell cycle and cell fate in the developing Drosophila eye. *Mech Dev* **123**, 151-65.

**Wahlstrom, G., Norokorpi, H. L. and Heino, T. I.** (2006). Drosophila alpha-actinin in ovarian follicle cells is regulated by EGFR and Dpp signalling and required for cytoskeletal remodelling. *Mech Dev*.

**Wang, Y. C. and Ferguson, E. L.** (2005). Spatial bistability of Dpp-receptor interactions during Drosophila dorsal-ventral patterning. *Nature* **434**, 229-34.

**Yasunaga, K., Saigo, K. and Kojima, T.** (2006). Fate map of the distal portion of Drosophila proboscis as inferred from the expression and mutations of basic patterning genes. *Mech Dev* **123**, 893-906.

Gbb/Scw sequences:

>MmusBMP5

MHWTVFLLRGIVGFLWSGWVQVGYAKGGLGDNHVHSSFIYRRLRNHERREIQREILSILGLPHRPRPFSPGKQASSAPLFMLDLYNAMASEDNPEESEYLVRVSLAGEAKETRKGYPASPNGYAHRLHLPPRTPLTTQSPPLASLHDTNFLNDADMVMSFVNLVERDKDFSHQRRHYKEFRFDLTQIPHGEAVTAAEFRIYKDKGNHRFENETIKISIYQIIKEYTNRDADLFLLDTRKTQALDVGWLVFDITVTSNHWVINPQNNLGLQLCAETGDGRSINVKSAGLVGRHGPQSKQPFMVAFFKASEVLLRSVRAASKRKNQNRNKSNSHQDPSRMPSAGDYNTSEQKQACKKHELYVSFRDLGWQDWIIAPEGYAAFYCDGECSFPLNAHMNATNHAIVQTLVHLMFPDHVPKPCCAPTKLNAISVLYFDDSSNVILKKYRNMVVRSCGCH

>MmusBMP6

mpglgrraqwlcwwwgllcscgppplrpplpvaaaaaggqllgaggspvraeqpppqssssgflyrrlkthekremqkeilsvlglphrprplhglqqpqppvlppqqqqqqqqqqtareepppgrlksaplfmldlynalsnddeedgasegvgqepgshggasssqlrqpspgaahslnrksllapgpgggaspltsaqdsaflndadmvmsfvnlveydkefsphqrhhkefkfnlsqipegeavtaaefrvykdcvvgsfknqtflisiyqvlqehqhrdsdlflldtrvvwaseegwlefditatsnlwvvtpqhnmglqlsvvtrdglhvnpraaglvgrdgpydkqpfmvaffkvsevhvrttrsassrrrqqsrnrstqsqdvsrgsgssdyngselktackkhelyvsfqdlgwqdwiiapkgyaanycdgecsfplnahmnatnhaivqtlvhlmnpeyvpkpccaptklnaisvlyfddnsnvilkkyrnmvvracgch

>MmusBMP7

mhvrslraaaphsfvalwaplfllrsaladfsldnevhssfihrrlrsqerremqreilsilglphrprphlqgkhnsapmfmldlynamaveesgpdgqgfsypykavfstqgpplaslqdshfltdadmvmsfvnlvehdkeffhpryhhrefrfdlskipegeavtaaefriykdyirerfdnetfqitvyqvlqehsgresdlflldsrtiwaseegwlvfditatsnhwvvnprhnlglqlsvetldgqsinpklagligrhgpqnkqpfmvaffkatevhlrsirstggkqrsqnrsktpknqealrmasvaensssdqrqackkhelyvsfrdlgwqdwiiapegyaayycegecafplnsymnatnhaivqtlvhfinpdtvpkpccaptqlnaisvlyfddssnvilkkyrnmvvracgch

>MmusBMP8

mamrpgplwllglalcalggghgprpphtcpqrrlgarerrdmqreilavlglpgrprpraqpaaarqpasaplfmldlyhamtddddggppqahlgradlvmsfvnmverdrtlgyqephwkefhfdltqipageavtaaefriykepsthplnttlhismfevvqehsnresdlffldlqtlrsgdegwlvlditaasdrwllnhhkdlglrlyvetadghsmdpglagllgrqaprsrqpfmvtffrasqspvrapraarplkrrqpkktnelphpnklpgifddghgsrgrevcrrhelyvsfrdlgwldwviapqgysayycegecafpldscmnatnhailqslvhlmkpdvvpkaccaptklsatsvlyydssnnvilrkhrnmvvkacgch

>AmelGbb

MSPRRLAPLLILGTILAGLTSTAAADRMSGLYVDNGFDQTIVHR

VVSQREKREVEHEILNLLGLPDRPRNTAGRPPQVKRSAPKFLLDIYKNALGEDEDEKP

IGEQQRRAGEFDLTGQDLRAIDQSDVIMTFAAHNHHVAGVRHERGKRLWFDVSEVPPG

EHIIGAELRLYRSMDVKNRRNRGSYMITAYRVLRTEDGTRELQYVDAVNTTTGKEGWL

TLNISESLSHWVNNPDGNKGLYLSVHPADRSVHEMRPEDIGILAFRGDPDKQPFMVGY

FKSSGIRESKVRQKRDARRRKKSESSSLDYRNNPYTDPGTQYNSRTCKIQTLYVSFRD

LKWQDWIIAPDGYDAYYCSGECNFPLNAHMNATNHAIVQTLVHLVSPGKVPKPCCAPT

KLSPISVLYFLDESNVILKKYKNMVVKSCGCH

>NvitGbb

SGLYVDNGYDQTVVHRVITQREKREVEHEILNLLGLPDRPPKHKANSAGPQVKRSAPKFL

LDIYRNGLADEESREHQTEFGLSGQDLRAIDQSDV

IMTFAAHNHHVPSVRHERGKRLWFDVSEVPENEHMINAELRLYRSLDQAKSAKNRGAFT

LTAYRVLRLEDGERELQYIDAVNATAGREGWLSLNVSEALQYWVANPAGNRGLYLSVHPA

DRQVHEMKPEDIGVVGFRGVAERQPFMVAFFKSSG-IRSRAAAAKSRQKRDAKRKKKAEI

SSLDYRSNPYTDPQIQYNSRTCKIQTLYVSFRDLQWQDWIIAPDGYDAYYCSGECNFPLN

AHMNATNHAIVQTLVHLVNPGKVPKPCCAPTKLSPISVLYFLDESNVILKKYKNMVVKSCGCH

>TcasGbb1

MNFVLVLSLVLGEALCWSKAGIYIDNGLNQTVIDREMTTSEKQEMEMEILNLLGLPERPKRVSNSLKRSAPKFLLDIYKSLMEEENEGHSRSERSADLNLSGDEQNAIDESDVIMTFESINHHVSSVRHERGKRLWFNVSEMPIAENVVGAELRIYQKEIHSPKKARNVYTVTVFELVNTDSGERELEYISAVNTTGSFTGWLNLNLTACLPTWVAFPDSNKGLYLSVHPVDKPGREIRPEDIGLITVKGEDETQPFMVAFLKASNHVQPKRSIRDLSSKRRVRKSNYVEMMLSDNPHYGSTCKMYDLYISFKDLKWQDWIIAPAGYSAHYCAGECKFPLNGHMNATNHAIVQTLVHLMYPNKYPKPCCAPTKLTPISVLYFQDDTNVILKKYKKMSVKSCGCH

>TcasGbb2

MKVVVASFVLLLVFREVSTFLKSGIYLDNGFDQTSIGQLGDQQIQLEVLNLLGLPNRPKKINNSVTKSAAKYILDIYNSLMEKIDGHSSRRKRSAGVNLSSEEETAVENSDVIMTFEAIRNSEKKFKRLEKGKKLWFNVSEMSVAEDVISAELKIFQKGAPKRAGNVYAVVVMIEKPGREIRPEEIGLTTSTNPFIVAFLKASTRVQPQRNVRSVSPKQNYVSTMKQYQHGTTCRIHTLYISFKDLKWQDWVIAPEGYAAYYCAGECNFPLTAHMNATKHALVQSLVHLIQPHKFPKPCCAPTELRPIPLVYYLDAGTSNVVLKKYSNMAVKSCGCH

>AgamGbb

mfrkyslcaaaivlyvliglvsstgfyidngvdqtvreksvelherqeieheilellglp

drpnkqhvhpslrksapqfllniyhkfteemnggrrrkryadganlltiaderaigesdv

imsflnkanrhlpkirhhrgghrlwfdtaeidaerdnnqllyaslrmyknrtterpwdai

vrgrqivvrasliggydaakdghrlelvaeqsvpynydgwvelnatqamqrwvvervank

gifvevyyaesprkeilphevglilsnrfgryqpflvgyckgpelvkptaalaggsgtvg

grskrsvrrkagtgtgkrsdrvrnpflerfggggerhkscqiqtlyvsfrdlnwqdwiia

pdgfgaffcfgecnfplnthmnatnhaliqtlvhlmhptrvpkpccaptklnpisvlyhi

ddaninlkkyknmvvkscgcl

>AaegGbb

mnlhillitvvhlvrctgasssgfyidngqgqtvretaitaedrqeieheildllglpdr

pnkehihpslrksapqfllniylkfseeingenrgrrvarnalysnsdlftladqraiee

sdwirtflnkghvnmpkvrhhrygerlvfdtseaasdgalllfaslkvyknlthdylnai

tngrlitirtslikgydsgrnmhemdllaehtlpydyqgwieinatnmmdrwiseslknk

gifvevfytespqkqvrpqnvglilsnkfgryqpflvsyykgrdlvkptphvsrskrsvg

npnqrkkpikktvrprnpllekwaikekscqihtlyvsfrelnwqdwiiapdgfgayfch

gecsfplnthmnatnhaliqtlvhlmhpasvpkpccaptkltpisvlyhiddaninlkky

knmvvkscgcl

>CpipGbb

VVAMITGALILLVVALRGALAVSGIYVDNGVSQTIRQNAITLHDRQEIEHEILDLL

GLPDRPNSKHIHPSLRKSAPQFLLNIYHKQLDAAKGRGRGRRQRDTGSV

YSRSLLTIADERVIEESDVIMTFLNKGHKDLPKIRHRRYGERLWFDTSETSADGA

MQLYASLRIYKNSTIDDWNAITSGRLITVRASLIREYNAKRGEHNLELIAEHTVPYNYEG

WLEINVTDAMDRWMTNRIGNKGIFVDAYYNERPSKNVRPQDFGLILSNKYGRYQPFLVSY

CKGRELVKPTTHNNRSKRSVVKNSPRKAPKKSLKPKNPFLERWTQKEKSCQIHTLYVS

FRDLNWQDWIIAPDGFGAFFCHGDCNFPLNTHMNATNHALIQTLVHLIHPNSVPKPCCAP

TKLNPISVLYHIDDANINLKKYKNMVVKSCGC

>DgriGbb

MLWLLLIISTVPYTQPTQSGIYIDNGKDQTVMQRVLTDDDKLDVSYEILEFLGISDRPLH

HKNHGLSLRKSAPKFLLDVYNRITAEEGLNKNNDHHRSKRDADEEDESEQN

FITDLDKRAIDESDIIMTFLNKRNHNVEEMRHEHGRRLWFDVTNVPGDNYLMMSELRIYQ

NSNEGKWLTTNKQFTVTVYMIQTGGLSQNNLEPLSSVNTTGDYVGWLELNVTEALHDWLT

NAKENHGIYIGAHAINKPDREIKLDDIGLIHHRVKVDDEYQPFMIGFFRGPELIRATAST

THSNQKRTKRSALHQRKKNKSEPSVNPFVDNPIENTRSCQMQTLYIDFKDLGWHDWIIAP

DGYGAFYCSGECNFPLNAHMNATNHAIVQTLVHLLEPKRVPKPCCAPTKLGALPVLYHLN

DENVNLKKYRNMIVKSCGCH

>DvirGbb

RIMTASLVVLPSLWLILIIFTAPHTHCTQSGIYIDNGKDQTVMERVLTDDDKLDV

SHEILEFLGIAARPLHHKSHGLSLRKSAPKFLLDVYYRITAEEGLAIKNKSDHSRS

KRDANESEQNFITDLDKRAIDESDIIMTFLNKRNHNVEEMRHEHGRRLWFDVNN

IPTDNYLMMAELRIYQNSNEGKWTTTNKQFTVTVYMLRSGGSAPNMLEPLSSVNTTGDYV

GWLELNVTEALHDWRVNSNENHGIYIGAHALNKPEREIKLDDIGLIHRRTKVDDENQPFM

IGFFRGPELIKSTSGHSTQKRTKRSTLHQRKKSKS-EPVNPFIENSIENTRSCQMQTLYI

DFKDLGWHDWIIAPEGYGAFYCSGECNFPLNAHMNATNHAIVQTLVHLLEPKRVPKPCCA

PTRLGALPVLYHLNDENVNLKKYRNMIVKSCGCH

>DmojGbb

VQNTMTPSIGVLPTLFAVIFIIFIAPQAESTQSGIYVDNGKDQTVMQRVLTDEDKL

DVSYEILEFLGIADRPMHHRNHGLSLRKSAPKFLLDVYNRITAEEGLTIQSSNE

HSRSKRDLNENEQNFITDLDKRAIDESDIIMTFLNKRNHNVEEMRHEHGRRLWFDV

SNIPNDNYLMMSELRIYQNSNEGKWMTTNKQFTVTVYMIRSSGSSQNTLEPLSSVNTTGD

YVGWLELNVTEALHDWRTNANENHGIYIGAHALNKPDREIKLDDIGLIHRKIKVDDENQP

FMIGFFRGPELIKATASHNAQRRTKRSTLHQRKKSKSEPVNPFAENIVENTRSCQMQT

LYIDFKDLGWHDWIIAPDGYGAFYCSGECNFPLNAHMNATNHAIVQTLVHLIEPKRVPKP

CCAPTRLGALPVLYHLNDENVNLKKYRNMIVKSCGCH

>DwilGbb

SNLRNPSASFYLSPYLIVLILFLPTPSGVGATQSGIYIDNGKDQTIMHRMLSEDDK

LDVSYEILEFLGIAERPMHHNSHQLSLRKSAPKFLLDVYHRITAEEGLGHANQGESGEHN

RRSKRDADLDDDLNDSMEENQNFITDLDKQAIDESDIIMTFLNKRNHNVDELRHEHGRRL

WFDVSNVPSDNSLMMAELRIYQDSNEGKWTTTNKAFTISVYLIGAGTTGQMTMEILSSVN

TTGDFVGWLELNVTEGLHDWLVNGKANHGIYIGAHAVNRPDREVKLDDIGLLIHRKVKLD

DEYQPFMIGFFRGPELIKATAHNNHHRAKRSTLHPRRKKKSESMHPFFDSPSNNSRSC

QMQTLYIDFKDLGWHDWIIAPEGYGAFYCSGECSFPLNAHMNATNHAIVQTLVHLMEPKR

VPKPCCAPTRLGALPVLYHLNDENVNLKKYKNMIVKSCGCH

>DperGbb

SSIRNTSEAVAALASLGLGFVLIIFVSTTPTVIDATQSGIYIDNGKDQTIMHRVLSDDDK

LDVSYEILEFLGIAERPTHHSSHPLSLRKSAPKFLLDVYHRITEEEGLGGGHTDDETVHS

HRSKRNADMSDERNADGEENFITDLDKRAIDESDIIMTFLNKRNHNVEELRHEHGRRLWF

DVSVPSDNYLVMAELRIYQNSNEGKWLTANKQFTITVYSMGLGESGQNTMEALSSVNTTGDYV

GWLELNVTEGLHEWLVHSKENHGIYIGAHAVNRPDREVKLDDVGLIHRKVDDEYQPFMIG

FFRGPELIKTTSHSSHHRSKRSTLHQRKKKKSVPVHPFLDVPIENTRSCQMQTLYIDF

KDLGWHDWIIAPEGYGAFYCSGECNFPLNAHMNATNHAIVQTLVHLLEPKKVPKPCCAPT

RLGALPVLYHLNDENVNLKKYRNMIVKSCGCH

>DpseGbb

fssirntseavaaltslglgfvliifvsttptvidatqsgiyidngkdqtimhrvlsddd

kldvsyeileflgiaerpthhsshqlslrksapkflldvyhriteeeglggghtddetvh

shrskrnadmsdernadgeenfitdldkraidesdiimtflnkrnhnveelrhehgrrlw

fdvskvpsdnylvmaelriyqnsnegkwltankqftitvysmglgesgqntmealssvnt

tgdyvgwlelnvteglhewlvhskenhgiyigahavnrpdrevklddvglihrkvddeyq

pfmigffrgpelikttshsshhrskrstlhqrkkkksvpvhpfldvpientrscqmqtly

idfkdlgwhdwiiapegygafycsgecnfplnahmnatnhaivqtlvhllepkkvpkpcc

aptrlgalpvlyhlndenvnlkkyrnmivkscgch

>DanaGbb

LSHLRNTSEAVAVLASLGLGLVLLVFMATTPIAIEATQSGIYVDNGRDQTIMQRVLSDDD

KLDVSYEILEFLGIADRPTRLSSHQLSLRKSAPKFLLDVYHRITAEEGLAGDQHGDGG

SHRSKRSLDLEEENGES-KNLITDLDKRAIDESDIIMTFLNKRNHNVDELRHEHGRRLWF

DVSNVPVDDYLVMAELRLYQNSNEGKWLTTNKEFTITVYAIGTGTLGQRTMEPLSSVNTT

GDYVGWLEMNVTEGLHEWLIKSKENHGIYIGAHAVNRPDREVKLDDIGLIHRKADDEFQP

FMIGFFRGPELIKTNAHSTHHRSKRSATHQPKRKKPVSTNMNPLQNVPIESTRSCR

MHTLYIDFKDLLWHDWIIAPEGYGAFYCSGECNFPLNAHMNATNHAIVQTLVHLMEPKKV

PKPCCAPTRLGALPVLYHLNDENVNLKKYRNMIVKSCGCH

>DereGbb

MSGLQNTSEAVAVLASLGLGLVLLMFVATTPPAVEATQSGIYIDNGKDQTIMHRVLSEDD

KLDVSYEILEFLGIAERPTHLSSHQLSLRKSAPKFLLDVYHRITAEEGLSEQDEDDSYEH

GHRSRRSVDLEEEEGDQQKNFITDLDKEAIDQSDIIMTFLNKRHHNVDELRHEHGRRLWF

EVSNVPSDNYLVMAELRIYQNANEGKWLTANREFTITVYAIGTGTLGQHTMEPLSSVNTT

GDYVGWLELNVTEGLHEWLVKSKDNHGIYIGAHAVNRPDREVKLDDIGLIHRKVDDEFQP

FMIGFFRGPELIKATAHSSHHRSKRSASHPRKRKKSVSPNNVPLLEPLENTRSCQMQTLY

IDFKDLGWHDWIIAPEGYGAFYCSGECNFPLNAHMNATNHAIVQTLVHLLEPKKVPKPCC

APTRLGALPVLYHLNDENVNLKKYKNMIVKSCGCH

>DyakGbb

MSGLRNTSEAVAVLASLGLGLVLLMFVATTPPAVEATQSGIYIDNGKDQTIMHRVLSEDD

KLDVSYEILEFLGIAERPTHLSSHQLSLRKSAPKFLLDVYHRITAEEGLSDQDEDDSYER

GHRARRSADLEDDEDEHQQKNFITDLDKRAIDESDIIMTFLNKRHHNVDELRHEHGRRLW

FDVSNVPNDNYLVMAELRIYQNANEGKWLTANREFTITVYSIGTGTLGQHTMEPLSSVNT

TGDYVGWLELNVTEGLHEWLVKSKDNHGIYIGAHAVNRPDREVKLDDIGLIHRKVDDEFQ

PFMIGFFRGPELIKATAHSSHHRSKRSASHPRKRKKSVSPNNVPLLEPMESTRSCQMQTL

YIDFKDLGWHDWIIAPEGYGAFYCSGECNFPLNAHMNATNHAIVQTLVHLLEPKKVPKPC

CAPTRLGALPVLYHLNDENVNLKKYRNMIVKSCGCH

>DmelGbb

msglrntseavavlaslglgmvllmfvattppaveatqsgiyidngkdqtimhrvlseddkldvsyeileflgiaerpthlsshqlslrksapkflldvyhritaeeglsdqdedddyerghrsrrsadleedegeqqknfitdldkraidesdiimtflnkrhhnvdelrhehgrrlwfdvsnvpndnylvmaelriyqnanegkwltanreftitvyaigtgtlgqhtmeplssvnttgdyvgwlelnvteglhewlvkskdnhgiyigahavnrpdrevklddiglihrkvddefqpfmigffrgpelikatahsshhrskrsashprkrkksvspnnvpllepmestrscqmqtlyidfkdlgwhdwiiapegygafycsgecnfplnahmnatnhaivqtlvhllepkkvpkpccaptrlgalpvlyhlndenvnlkkyrnmivkscgch

>DgriScw

EQPLAEQFEMLDLLDLGNRPRRLAQPELHNSASKFLLEVYNEINEEQEPQEVLHQRHKRS

MEDDILLTRADRQEIASSNSILTFSSRNRDLGNELDMHITFNTNDVPMDLMLVQAMLR

IYKQPSLQEQRQNLTISVYKKIYSHNQDGGAYRILQSLNTTVNYKGWLEFNLTQTLHTWL

LHRGLQKQRHELRISLGDTKLGALAAGLVPPQELHTNLEPYIVGYFNGPELLVKVQKLRF

KRELHKRKATLAASGYHHMPPPDYYKPPQSCERLNFTVDFKELQMHNWVIAPKKFEAYFC

GGGCNFPLGTKMNATNHAIVQTLMHLKQPHLPKPCCVPTVLGAITILRYLNEDIIDLTKY

QKAVAKECGCH

>DvirScw

LLSSYLGVLGTTYVTGDVNMEPTTLAEQLEMVDLLDLGDRPRRMAQPKQLHTSAT

KFLLEVYNEINEEQEPQEVLQQRHKRSLEDDILVTREDRQEIASCNSILTFSSRLKSLEQ

GEKEEGEINSRQDLHITFNTNDVPVDLTLVQAMLRIYKQPSWQEQRQNFTVSVYRRIHSH

QAFMEDGAPVYRILHSVNTTTHYKGWLEFNLTQTLRAWLLNKSPQRHELRISLGEARVS

ALGAGLVAPQAADSNLEPFIVGYFNGPELLVKVQKLRFKRDLNKRRAMLPPTGHVRPPP

VFKAPQSCERLNFTVDFKELQMHNWVIAPKKFEAYFCGGGCNFPLGTKMNATNHAIVQT

LMHLKQPHLPKPCCVPTVLGAITILRYINEDIIDLTKYQKTVAKECGCH

>DmojScw

ALTTSYVTVDSSVQPALAEQLEMIDLLDLGDRPRRMAQPTELHNSASKFLLEAY

NEISEEQEPQEVLQQRHKRSLDDDILLTREDRKEMASCNSILTFSSRAQSSSSEQDQLDM

HITFNTNDVPVDLMLMQATLRIYKQPSVLEKRQNLTVSVYRTIHSHQQGIEAPPVYRILS

SVNTTAHYKGWLEFNLTRTLRTWLLSRSPERHELRISLGEEAPLTAWHAGLVAPQDIQS

NLQPFIVGYFKGPELLVKVQKLRFKRDLQKRKASQPRPPPPADLYKPPQSCERLNF

TVDFKELQMHNWVIAPKKFEAYFCGGGCNFPLGTKMNATNHAIVQTLMHLKQPHLPKPCC

VPTALGAITILRYINEDIIDLTKYQKTVAKECGCH

>DwilScw

SGTTYITTNPHMNTQVFEERALSQQLEMIDLLDLSDRPRRQAVPNIYNSASKFLLEVYNE

INEDQEPQEVLHQRHKRSLDDDILISEEDRQEIASCNSILTFSSRQKQDLSNDLDLHVT

FNTNDVPMELSLMHAILRIYKEPSSEEQSNNLTVSIYRRLYRSQDAPYRILHSVNTTAQF

KGWLEFNFTQTLRAWLLNKSIQQRHELRISIGDSQLSALGAGLVPPQGSRSNLEPFIVGY

FSGPELLVKIQKLRFKRELQKRKVGAPMRLPPPPAFKPPHSCERLNFTVDFKQLHL

HNDVIAPNKFEAYFCGGGCNFPLGNKMNATNHAIVQTLMHLKQPHLPKPCCVPTVLGSIT

ILRHINEDIFDLTKYQKAVAKECGCH

>DperScw

FLILALASCVMSSTYIDINHHMETPPIYDTRPLSEQMEMIDLLDLGDRPRRQAQPNLHNS

ASKFLLEVYNEINEGQEPEEVLHQRHKRSLDDDILISNEDRQEIASCNSILTFSSRVKPE

DHSNDLDLHITFNTNDVPADLTLVQAMLRVYKQESLVDRRDNVTVSVYRRLDNRPDYSYQ

ILGSVSTTTSHKGWLEFNLTPTLRTWLLGRSLQQRHELRFSIGYSHLSTFAAGLVPPAAS

RSSQEPFIVGYFNGPELLVKIQKLRFKRDLQKRRANSPPQRPPPPPMDLYKPPQSCER

LNFTVDFKELQMHNWVIAPKKFEAYFCGGGCNFPLGTKMNATNHAIVQTLMHLKQPHLPK

PCCVPTVLGSITILRYLSEDIIDLTKYQKSVAKECGCH

>DpseScw

msstyidinhhmetppiydtrplseqmemidlldlgdrprrqaqpnlhnsaskfllevyn

einegqepeevlhqrhkrsldddilisnedrqeiascnsiltfssrvkpedhsneldlhi

tfntndvpadltlvqamlrvykqeslvdrrdnmtvsvyrrldnrpdysyqilgsvnttts

hrgwlefnltptlrtwlfgrslqqrhelrfsigdshlstfaaglvppaasrssqepfivg

yfngpellvkiqklrfkrdlqkrransppqrpppppmdlykppqscerlnftvdfkelqm

hnwviapkkfeayfcgggcnfplgtkmnatnhaivqtlmhlkqphlpkpccvptvlgsit

ilrylsediidltkyqksvakecgch

>DanaScw

MFLLILLTSSVYFVVGTTYVTTNNQAEMPIYQKRPQSEQMEMIDILDLGDRPKRQLSPNL

DNSASKFLLEVYNEINEDQEPKEVLHQRHRRSLDDDILISKEDREEIANCNSILTFSSRI

KPEEVNNELDLHITFNTNDVPVDLTLVQAMLRVYKQPSLVQRRENFTVSIYKRLGDRQDF

SHRILGSVNTTSSYRGWLEFNLTPVLQTWLLSKNFLKRNELRISIGDSQLSTFAAGLVAP

QASRSSLEPFIVGYFNGPELLVKIQKLRFKRDLQKRRANSQPANPHVHPPPPVDLYKPPQ

SCERLNFTVDFKELQMHNWVIAPKKFEAYFCGGGCNFPLGTKMNATNHAIVQTLMHLKQP

HLPKPCCVPTVLGAITILRYLNEDIIDLTKYQKSVAKECGCH

>DereScw

MLNVFLITSLFYAASGTTYVTTNSHIEMPIYQKRPLSEQMEMIDILDLGDRPRRQAEPNL

HNSASKFLLEVYNEISEDQEPKEVLHQRHKRSLDDDILISNEDRQEIASCNSILTFSSRL

KPEELGNELDMHITFNTNDVPVDLSLVQAMLRIYKQPSLVDRRENFTVSVYRKLDNRQDF

SYRILGSVNTTSSQRGWLEFNLTETLRSWLLNKGLQRRNELRISIGDSQLSTFAAGLVTP

QASRSNLEPFIVGYFNGPELLVKVQKLRFKRDLEKRRTGGSAPPPPPPPVDLYRPPQSC

ERLNFTVDFKELHMHNWVIAPKKFEAYFCGGGCNFPLGTKMNATNHAIVQTLMHLKQPHL

PKPCCVPTILGAITILRYLNEDIIDLTKYQKAVAKECGCH

>DyakScw

MFNVFLITSLLYVASGTSYVTTNSHIEMPIYQKRPLSEQMEMIDILDLGDRPRRQAEPNL

HNSASKFLLEVYNEISEDQEPKEVLHQRHKRSLDDDILISNEDRQEIASCNSILTFSSRI

KPEEPDNELDMHITFNTNDVPVDLSLVQAMLRIYKQPSLVDRRENFTVSVYRKLDNRQDF

SYRILGSVNTTTSQRGWLEFNLTETLRTWLLNKGLQRRNELRISIGDSQLSSFAAGLVTP

QTSRSGLEPFIVGYFNGPELLVKIQKLRFKRDLEKRRAGGSPPPPPPPPVDLYRPPQSC

ERLNFTVDFKELHMHNWVIAPKKFEAYFCGGGCNFPLGTKMNATNHAIVQTLMHLKQPHL

PKPCCVPTVLGAITILRYLNEDIIDLTKYQKAVAKECGCH

>DsimScw

MLNVFLITSLFYVASATTYVTTNSHIEMPIYQKRPLSEQMEMIDILDLGDRPRRQAEPNL

HNSASKFLLEVYNEISEDQEPKEVLHQRHKRSLDDDILISNEDRQEIASCNSILTFSSRL

KPEELNNELDMHITFNTNDVPVDLSLVQAMLRIYKQPSLVDRRENFTVSVYRKLDNRQDF

SYRILGSVNTTSSQRGWLEFNLTDTLRSWLLNKGLQRRNELRISIGDSQLSTFAAGLVTP

QASPSSLEPFIVGYFNGPELLVKIQKLRFKRDLEKRRAGGGSPPPPPPPPVDLYRPPQSC

ERLNFTVDFKELHMHNWVIAPKKFEAYFCGGGCNFPLGTKMNATNHAIVQTLMHLKQPHL

PKPCCVPTVLGAITILRYLNEDIIDLTKYQKAVAKECGCH

>DmelScw

mlnvffltslfyaasattyvttnnhiempiyqkrplseqmemidildlgdrprrqaepnlhnsaskfllevyneisedqepkevlhqrhkrsldddilisnedrqeiascnsiltfssrlkpeqldneldmhitfntndvpvdlslvqamlriykqpslvdrranftvsvyrkldnrqdfsyrilgsvnttssqrgwlefnltdtlrywlhnkglqrrnelrisigdsqlstfaaglvtpqasrtslepfivgyfngpellvkiqklrfkrdlekrragggsppppppppvdlyrppqscerlnftvdfkelhmhnwviapkkfeayfcgggcnfplgtkmnatnhaivqtlmhlkqphlpkpccvptvlgaitilrylnediidltkyqkavakecgch

>DsimGbb

msglrntseavavlaslglgmvllmfvattppaveatqsgiyidngkdqtimhrvlseddkldvsyeileflgiaerpthlsshqlslrksapkflldvyhritaeeglsdqdedddyerghrsrrsadleedegeqqknfitdldkraidesdiimtflnkrhhnvdelrhehgrrlwfdvsnvpndnylvmaelriyqnanegkwltanreftitvyaigtgtlgqhtmeplssvnttgdyvgwlelnvteglhewlvkskdnhgiyigahavnrpdrevklddiglihrkvddefqpfmigffrgpelikatahsshhrskrsashprkrkksvspnnvpllepmestrscqmqtlyidfkdlgwhdwiiapegygafycsgecnfplnahmnatnhaivqtlvhllepkkvpkpccaptrlgalpvlyhlndenvnlkkyrnmivkscgch
